# Supplementary material for: The effects of the E3 ubiquitin–protein ligase UBR7 of Frankliniella occidentalis on the ability of insects to acquire and transmit TSWV
Source: PeerJ. 2023 May 9;11:e15385. doi: 10.7717/peerj.15385 (PMC10178284; doi:10.7717/peerj.15385)
Supplement: Supplemental Information 2 [file peerj-11-15385-s002.xlsx]

## Sheet: Protein Peptide Information
Accession	Description	Mass	Score	Matches	Sequences	emPAI	Coverage
gi|284810746	nucleocapsid protein [Tomato spotted wilt tospovirus]	29094	650	34(23)	16(12)	4.08	51%
	Peptide	Unique	Matches	Modification	Observed	Mr(expt)	Mr(calc)	ppm	Miss	Score	Expect	Rank	Query
	K.VCTVLK.S		1		360.2108	718.4071	718.4048	3.25	0	14	0.12	1	33
	R.RLDSLIR.V	U	3		436.7717	871.5288	871.5239	5.65	1	36	0.00041	1	950
	R.IGATD->M<-TFR.R	U	4	Oxidation (M)	514.2495	1026.4843	1026.4804	3.81	0	30	0.0016	1	2285
	K.FYE->M<-FGVKK.Q	U	1	Oxidation (M)	582.7925	1163.5705	1163.5685	1.73	1	23	0.014	1	3753
	R.IGATD->M<-TFRR.L	U	1	Oxidation (M)	395.2029	1182.5868	1182.5815	4.46	1	4	0.97	1	4020
	K.ENIVALLTQGK.D	U	1		593.3485	1184.6825	1184.6765	5.06	0	38	0.00035	1	4035
	K.AFE->M<-NEDQVK.K	U	2	Oxidation (M)	613.7744	1225.5343	1225.5285	4.72	0	40	0.00011	1	4467
	K.AFE->M<-NEDQVKK.G	U	1	Oxidation (M)	452.2161	1353.6266	1353.6234	2.30	1	(21)	0.0072	1	6246
	K.AFE->M<-NEDQVKK.G	U	1	Oxidation (M)	677.8215	1353.6285	1353.6234	3.74	1	23	0.0053	1	6247
	K.EYAAILSSSNPNAK.G	U	4		732.8737	1463.7329	1463.7256	5.00	0	61	1.8e-006	1	8132
	K.TFCLENLDQIKK.M	U	1		754.8953	1507.7760	1507.7704	3.66	1	11	0.23	1	8860
	K.LTKENIVALLTQGK.D	U	1		764.4614	1526.9083	1526.9032	3.37	1	58	1.7e-006	1	9133
	K.GSIA->M<-EHYSETLNK.F	U	1	Oxidation (M)	798.3757	1594.7369	1594.7297	4.53	0	25	0.0033	1	10133
	K.GSIA->M<-EHYSETLNK.F	U	1	Oxidation (M)	532.5870	1594.7391	1594.7297	5.91	0	(14)	0.043	1	10134
	K.GKEYAAILSSSNPNAK.G	U	1		550.6226	1648.8459	1648.8420	2.34	1	1	4	1	10764
	R.LVEETGNSENLNTIK.S	U	4		830.9269	1659.8393	1659.8315	4.71	0	80	3.2e-008	1	10898
	R.VRLVEETGNSENLNTIK.S	U	1		639.3438	1915.0094	1915.0010	4.38	1	109	2.6e-011	1	13492
	K.IASHPLIQAYGLPLDDAK.S	U	2		961.5263	1921.0379	1921.0309	3.68	0	84	6.5e-009	1	13533
	K.IASHPLIQAYGLPLDDAK.S	U	3		641.3545	1921.0416	1921.0309	5.60	0	(57)	2.7e-006	1	13534
gi|729042213	glyceraldehyde 3-phosphate dehydrogenase-A [Nicotiana benthamiana]	42945	115	10(5)	7(5)	0.45	19%
	Peptide	Unique	Matches	Modification	Observed	Mr(expt)	Mr(calc)	ppm	Miss	Score	Expect	Rank	Query
	K.VLITAPGK.G	U	2		399.7599	797.5052	797.5011	5.12	0	8	0.31	1	407
	R.LLDASHR.D	U	1		406.2259	810.4372	810.4348	2.94	0	4	0.38	1	521
	K.VIQVVSDR.N	U	1		458.2667	914.5188	914.5185	0.32	0	20	0.032	1	1289
	K.AVALVLPSLK.G	U	1		505.8364	1009.6583	1009.6535	4.71	0	50	9.1e-006	1	2083
	K.TFAEEVNAAFR.E	U	2		627.8139	1253.6132	1253.6040	7.35	0	32	0.0013	1	4879
	R.AAALNIVPTSTGAAK.A	U	2		692.8961	1383.7776	1383.7722	3.91	0	45	4.3e-005	1	6641
	R.VPTPNVSVVDLVVQVSKK.T	U	1		636.7147	1907.1222	1907.1092	6.80	1	27	0.0022	1	13400
gi|926663240	heat shock protein 90-1 [Nicotiana benthamiana]	80443	94	6(3)	5(2)	0.08	6%
	Peptide	Unique	Matches	Modification	Observed	Mr(expt)	Mr(calc)	ppm	Miss	Score	Expect	Rank	Query
	K.FAELLR.Y	U	1		374.7228	747.4311	747.4279	4.24	0	10	0.33	1	129
	K.->M<-TLYLK.E	U	1	Oxidation (M)	392.7209	783.4272	783.4200	9.09	0	2	1.5	2	303
	K.RAPFDLFDTK.K	U	1		605.3184	1208.6223	1208.6190	2.74	1	2	2	1	4358
	K.ADLVNNLGTIAR.S	U	2		628.8555	1255.6965	1255.6884	6.43	0	50	1.3e-005	1	4923
	K.GIVDSEDLPLNISR.E	U	1		764.4075	1526.8004	1526.7940	4.17	0	55	1.7e-005	1	9125
gi|1219878403	Gc-Gn glycoprotein precursor [Chrysanthemum stem necrosis virus]	130189	89	6(4)	5(4)	0.10	4%
	Peptide	Unique	Matches	Modification	Observed	Mr(expt)	Mr(calc)	ppm	Miss	Score	Expect	Rank	Query
	R.IYSVLK.S		2		361.7265	721.4385	721.4374	1.52	0	23	0.0047	1	36
	R.HFSVGTK.F	U	1		388.2103	774.4061	774.4025	4.72	0	19	0.046	1	286
	K.LSGDCKITK.S	U	1		511.2673	1020.5200	1020.5274	-7.18	1	5	1.1	1	2229
	K.VVIDLPSDLFK.V	U	1		623.3613	1244.7081	1244.7016	5.19	0	19	0.02	1	4749
	K.SNFANPYTVSITSPEK.I	U	1		877.9387	1753.8628	1753.8523	5.99	0	74	8.2e-008	1	11900
gi|660450867	domains rearranged methyltransferase 1 [Nicotiana benthamiana]	69106	78	4(4)	1(1)	0.05	0%
	Peptide	Unique	Matches	Modification	Observed	Mr(expt)	Mr(calc)	ppm	Miss	Score	Expect	Rank	Query
	R.ILDLVK.S	U	4		350.7348	699.4551	699.4531	2.92	0	31	0.00095	1	1
gi|958108899	ribulose-1,5-bisphosphate carboxylase/oxygenase small chain (Rubisco) [Nicotiana benthamiana]	20557	76	9(2)	2(1)	0.16	8%
	Peptide	Unique	Matches	Modification	Observed	Mr(expt)	Mr(calc)	ppm	Miss	Score	Expect	Rank	Query
	K.SPGYYDGR.Y	U	1		457.7054	913.3963	913.3930	3.65	0	5	0.3	1	1276
	R.IIGFDNVR.Q	U	8		467.2633	932.5121	932.5080	4.46	0	49	4.2e-005	1	1390
gi|511774224	2-Cys peroxiredoxin, partial [Nicotiana benthamiana]	25600	66	7(3)	5(3)	0.44	22%
	Peptide	Unique	Matches	Modification	Observed	Mr(expt)	Mr(calc)	ppm	Miss	Score	Expect	Rank	Query
	R.GLFIIDK.E	U	1		403.2473	804.4801	804.4745	6.88	0	5	0.32	1	453
	K.LSEYIGK.K	U	3		405.2250	808.4354	808.4330	2.92	0	1	4.4	2	491
	R.SVDETLR.T	U	1		410.2159	818.4173	818.4134	4.81	0	35	0.00034	1	580
	K.SYNVLIPDQGIALR.G	U	1		779.9366	1557.8587	1557.8515	4.67	0	27	0.0031	1	9617
	R.KSGGLGDLNYPLISDVTK.S	U	1		626.3406	1876.0001	1875.9942	3.15	1	34	0.0012	1	13122
gi|61697115	chloroplast photosynthetic oxygen-evolving protein 33 kDa subunit [Nicotiana benthamiana]	35374	58	6(2)	5(2)	0.20	16%
	Peptide	Unique	Matches	Modification	Observed	Mr(expt)	Mr(calc)	ppm	Miss	Score	Expect	Rank	Query
	R.VPFLFTIK.Q	U	1		482.7988	963.5831	963.5793	3.90	0	34	0.00061	1	1700
	R.LTFDEIQSK.T	U	1		540.7858	1079.5571	1079.5499	6.69	0	3	0.85	1	2809
	K.RLTFDEIQSK.T	U	2		618.8357	1235.6568	1235.6510	4.73	1	2	1.2	1	4632
	R.GGSTGYDNAVALPAGGR.G	U	1		781.8836	1561.7527	1561.7485	2.68	0	1	0.9	1	9653
	K.QLVASGKPESFSGEFLVPSYR.G	U	1		766.7327	2297.1764	2297.1692	3.12	0	39	0.00025	1	15726
gi|84620802	chloroplast photosystem II 22 kDa component [Nicotiana benthamiana]	28996	53	1(1)	1(1)	0.11	5%
	Peptide	Unique	Matches	Modification	Observed	Mr(expt)	Mr(calc)	ppm	Miss	Score	Expect	Rank	Query
	K.SALGLSEGGPLFGFTK.A	U	1		790.9226	1579.8305	1579.8246	3.76	0	53	9.7e-006	1	9898
gi|1178873519	HSP70 [Nicotiana benthamiana]	71489	50	13(4)	10(4)	0.20	19%
	Peptide	Unique	Matches	Modification	Observed	Mr(expt)	Mr(calc)	ppm	Miss	Score	Expect	Rank	Query
	R.LSKEEIEK.M	U	1		488.2738	974.5330	974.5284	4.79	1	8	0.49	1	1793
	K.ITITNDKGR.L	U	1		509.2903	1016.5661	1016.5614	4.60	1	15	0.071	1	2175
	K.DAGVIAGLNVLR.I	U	1		599.3538	1196.6930	1196.6877	4.39	0	37	0.00023	1	4179
	R.EIAEAFLGSTVK.N	U	1		632.8465	1263.6784	1263.6711	5.85	0	21	0.013	1	5036
	K.VQQLLQDFFNGK.E	U	1		718.8823	1435.7501	1435.7460	2.87	0	12	0.36	1	7619
	R.ARFEELN->M<-DLFR.K	U	2	Oxidation (M)	778.8854	1555.7563	1555.7453	7.10	1	5	0.93	1	9584
	R.IINEPTAAAIAYGLDK.K	U	1		830.4548	1658.8950	1658.8879	4.28	0	18	0.024	1	10884
	K.NQVA->M<-NPINTVFDAK.R	U	2	Oxidation (M)	839.4179	1676.8213	1676.8192	1.23	0	7	0.45	1	11065
	K.NAVVTVPAYFNDSQR.Q	U	2		840.9232	1679.8319	1679.8267	3.07	0	18	0.047	1	11100
	K.NALENYAYNMRNTVK.D	U	1		900.9284	1799.8423	1799.8624	-11.19	1	0	1.5	1	12396
gi|284810802	non-structural protein, partial [Tomato spotted wilt tospovirus]	28189	45	8(5)	4(3)	0.40	20%
	Peptide	Unique	Matches	Modification	Observed	Mr(expt)	Mr(calc)	ppm	Miss	Score	Expect	Rank	Query
	R.TVNSLAVK.S		1		416.2520	830.4894	830.4862	3.91	0	3	0.79	1	686
	K.VNVLSPNR.N		3		449.7608	897.5070	897.5032	4.28	0	26	0.0031	1	1113
	K.VLSPAQLHSIGST->M<-NR.S	U	2	Oxidation (M)	576.3060	1725.8961	1725.8832	7.47	0	16	0.032	1	11603
	K.SLL->M<-SAENNI->M<-PNSQAFVK.A	U	1	2 Oxidation (M)	1063.5186	2125.0225	2125.0183	1.98	0	30	0.0033	1	14869
	K.SLL->M<-SAENNI->M<-PNSQAFVK.A	U	1	2 Oxidation (M)	709.3494	2125.0265	2125.0183	3.82	0	(5)	1.2	1	14871
gi|380505032	actin, partial [Nicotiana benthamiana]	37620	44	4(2)	2(1)	0.09	8%
	Peptide	Unique	Matches	Modification	Observed	Mr(expt)	Mr(calc)	ppm	Miss	Score	Expect	Rank	Query
	R.AVFPSIVGRPR.H	U	1		400.2432	1197.7077	1197.6982	7.87	0	11	0.14	1	4186
	R.VAPEEHPVLLTEAPLNPK.A	U	1		977.5391	1953.0637	1953.0571	3.37	0	(0)	1.6	1	13765
	R.VAPEEHPVLLTEAPLNPK.A	U	2		652.0304	1953.0694	1953.0571	6.28	0	35	0.00047	1	13767
gi|1058205715	histome monoubiquitnation 1 [Nicotiana benthamiana]	98265	43	4(3)	2(2)	0.07	1%
	Peptide	Unique	Matches	Modification	Observed	Mr(expt)	Mr(calc)	ppm	Miss	Score	Expect	Rank	Query
	K.IDDQLR.G	U	2		380.2049	758.3952	758.3923	3.84	0	15	0.041	1	200
	R.FLDVRK.S	U	2		389.2361	776.4577	776.4545	4.12	1	29	0.0012	1	293
gi|544370433	proteinase inhibitor, partial [Nicotiana benthamiana]	15538	40	1(1)	1(1)	0.22	11%
	Peptide	Unique	Matches	Modification	Observed	Mr(expt)	Mr(calc)	ppm	Miss	Score	Expect	Rank	Query
	R.FPEVLDINGEPLHVGER.Y	U	1		640.9998	1919.9775	1919.9741	1.73	0	40	0.00034	1	13530
gi|37783255	translation elongation factor 1 alpha, partial [Nicotiana benthamiana]	24550	39	3(2)	2(2)	0.29	15%
	Peptide	Unique	Matches	Modification	Observed	Mr(expt)	Mr(calc)	ppm	Miss	Score	Expect	Rank	Query
	K.IGGIGTVPVGR.V	U	2		513.3119	1024.6092	1024.6030	6.13	0	18	0.032	1	2272
	R.VETGVLKPG->M<-VVTFGPTGLTTEVK.S	U	1	Oxidation (M)	826.1194	2475.3363	2475.3295	2.75	0	36	0.0003	1	16450
gi|257222628	thioredoxin H-type 1, partial [Nicotiana benthamiana]	13460	35	1(1)	1(1)	0.25	9%
	Peptide	Unique	Matches	Modification	Observed	Mr(expt)	Mr(calc)	ppm	Miss	Score	Expect	Rank	Query
	R.FIAPVLADIAK.K	U	1		579.3527	1156.6908	1156.6856	4.49	0	35	0.0015	1	3699
gi|304368145	glycolate oxidase [Nicotiana benthamiana]	40627	31	5(3)	4(3)	0.26	8%
	Peptide	Unique	Matches	Modification	Observed	Mr(expt)	Mr(calc)	ppm	Miss	Score	Expect	Rank	Query
	R.ILIDVSK.I	U	1		394.2521	786.4896	786.4851	5.74	0	18	0.027	1	330
	R.ILFRPR.I	U	2		401.2607	800.5068	800.5021	5.91	0	12	0.098	1	423
	K.AIALTVDTPR.L	U	1		528.8093	1055.6040	1055.5975	6.14	0	22	0.015	1	2608
	R.FVLPPFLTLK.N	U	1		587.8715	1173.7285	1173.7162	10.5	0	21	0.0076	1	3916
gi|313585890	phosphoglycerate kinase (chloroplast) [Nicotiana benthamiana]	50224	30	6(2)	6(2)	0.14	16%
	Peptide	Unique	Matches	Modification	Observed	Mr(expt)	Mr(calc)	ppm	Miss	Score	Expect	Rank	Query
	K.YSLAPLVPR.L	U	1		508.3030	1014.5913	1014.5862	5.08	0	2	1.1	1	2150
	R.LSELLGIQVVK.V	U	1		599.8755	1197.7364	1197.7333	2.64	0	27	0.0021	1	4188
	K.ELDYLVGAVSNPK.R	U	1		702.8754	1403.7362	1403.7296	4.67	0	12	0.14	1	6956
	K.FLKPSVAGFLLQK.E	U	1		483.2958	1446.8657	1446.8599	4.03	0	10	0.093	1	7835
	K.GVSLLLPSDVVIADK.F	U	1		763.4500	1524.8855	1524.8763	6.00	0	16	0.025	1	9069
	K.GVTTIIGGGDSVAAVEK.V	U	1		787.4301	1572.8457	1572.8359	6.20	0	17	0.058	1	9822
gi|1238375496	plastid carbonic anhydrase [Nicotiana benthamiana]	34900	30	5(3)	4(3)	0.31	14%
	Peptide	Unique	Matches	Modification	Observed	Mr(expt)	Mr(calc)	ppm	Miss	Score	Expect	Rank	Query
	K.AGFIHFK.T	U	1		410.2307	818.4468	818.4439	3.54	0	9	0.2	1	582
	K.NPALYGELSK.G	U	1		546.2927	1090.5709	1090.5658	4.63	0	22	0.013	1	2972
	R.NIAN->M<-VPAYDK.T	U	2	Oxidation (M)	626.3094	1250.6042	1250.5965	6.18	0	21	0.018	1	4817
	R.VCPSHILNFQPGEAFVVR.N	U	1		690.6916	2069.0529	2069.0517	0.61	0	20	0.035	1	14517
gi|387861274	S-adenosyl homocysteine hydrolase [Nicotiana benthamiana]	53655	27	3(1)	2(1)	0.06	4%
	Peptide	Unique	Matches	Modification	Observed	Mr(expt)	Mr(calc)	ppm	Miss	Score	Expect	Rank	Query
	R.TEFGPSQPFK.G	U	1		569.2837	1136.5528	1136.5502	2.28	0	5	1.5	1	3511
	R.LVGVSEETTTGVKR.L	U	1		738.4107	1474.8069	1474.7991	5.24	1	(7)	1.2	1	8351
	R.LVGVSEETTTGVKR.L	U	1		492.6097	1474.8074	1474.7991	5.60	1	27	0.013	1	8352
gi|1827296421	ATP synthase F1 subunit 1 (mitochondrion) [Nicotiana benthamiana]	55476	27	7(3)	6(3)	0.19	11%
	Peptide	Unique	Matches	Modification	Observed	Mr(expt)	Mr(calc)	ppm	Miss	Score	Expect	Rank	Query
	R.VGSAAQLK.T	U	1		387.2306	772.4466	772.4443	2.95	0	24	0.039	1	271
	R.ELIIGDR.Q	U	1		408.2354	814.4563	814.4548	1.82	0	21	0.011	1	557
	R.VVSVGDGIAR.V	U	1		486.7800	971.5454	971.5400	5.54	0	2	1	1	1752
	K.AVDSLVPIGR.G	U	2		513.8042	1025.5938	1025.5869	6.73	0	14	0.038	1	2279
	R.MPLDRISQYER.A	U	1		704.3494	1406.6843	1406.6976	-9.45	1	3	1.8	1	7026
	R.Q->M<-SLLLRRPPGR.E	U	1	Oxidation (M)	480.6116	1438.8129	1438.8191	-4.29	1	1	0.85	1	7695
gi|1126528296	chloroplast carbonic anhydrase, partial [Nicotiana benthamiana]	19552	26	1(1)	1(1)	0.17	5%
	Peptide	Unique	Matches	Modification	Observed	Mr(expt)	Mr(calc)	ppm	Miss	Score	Expect	Rank	Query
	K.FLVFACSDSR.V	U	1		601.2898	1200.5650	1200.5598	4.39	0	26	0.0051	1	4205
gi|148498114	THIC, partial [Nicotiana benthamiana]	7781	24	6(1)	1(1)	0.45	8%
	Peptide	Unique	Matches	Modification	Observed	Mr(expt)	Mr(calc)	ppm	Miss	Score	Expect	Rank	Query
	K.ITEDIR.K	U	6		373.7071	745.3997	745.3970	3.60	0	24	0.016	1	117
gi|1147161362	RdRp [Melon severe mosaic tospovirus]	332651	24	2(1)	2(1)	0.01	0%
	Peptide	Unique	Matches	Modification	Observed	Mr(expt)	Mr(calc)	ppm	Miss	Score	Expect	Rank	Query
	R.VLVQLR.D	U	1		364.2467	726.4788	726.4752	5.02	0	6	0.26	1	69
	K.LALDRILR.S		1		485.3103	968.6061	968.6131	-7.19	1	24	0.0043	1	1736
gi|821316576	cytosolic glyceraldehyde-3-phosphate dehydrogenase 1 [Nicotiana benthamiana]	37097	23	7(3)	5(2)	0.19	14%
	Peptide	Unique	Matches	Modification	Observed	Mr(expt)	Mr(calc)	ppm	Miss	Score	Expect	Rank	Query
	K.VVISAPSK.D	U	1		400.7491	799.4837	799.4803	4.15	0	10	0.19	1	415
	K.TLLFGEK.S	U	2		404.2365	806.4585	806.4538	5.87	0	17	0.021	1	484
	K.LTG->M<-AFR.V	U	1	Oxidation (M)	406.2115	810.4085	810.4058	3.38	0	18	0.019	1	519
	K.DAP->M<-FVVGVNEK.E	U	1	Oxidation (M)	661.3299	1320.6452	1320.6384	5.19	0	14	0.066	1	5834
	R.AASFNIIPSSTGAAK.A	U	2		717.8877	1433.7608	1433.7514	6.58	0	13	0.12	1	7572
gi|224815412	Rab GDP dissociation inhibitor [Nicotiana benthamiana]	50120	19	1(1)	1(1)	0.07	1%
	Peptide	Unique	Matches	Modification	Observed	Mr(expt)	Mr(calc)	ppm	Miss	Score	Expect	Rank	Query
	R.KVGKVAR.A	U	1		379.2511	756.4877	756.4970	-12.27	2	19	0.024	1	175
gi|189909333	putative galactomannan galactosyl transferase [Coffea arabica]	52073	19	9(2)	1(1)	0.06	1%
	Peptide	Unique	Matches	Modification	Observed	Mr(expt)	Mr(calc)	ppm	Miss	Score	Expect	Rank	Query
	K.TIKNWDEK.R	U	9		517.2643	1032.5141	1032.5240	-9.55	1	18	0.033	1	2377
gi|582014367	nuclear pore complex protein Nup136b [Nicotiana benthamiana]	133457	17	3(1)	1(1)	0.02	0%
	Peptide	Unique	Matches	Modification	Observed	Mr(expt)	Mr(calc)	ppm	Miss	Score	Expect	Rank	Query
	K.LEISAADQK.A	U	3		487.7625	973.5105	973.5080	2.60	0	17	0.051	1	1776
gi|1341121533	putative effector protein [Heterodera avenae]	28556	16	2(1)	2(1)	0.12	5%
	Peptide	Unique	Matches	Modification	Observed	Mr(expt)	Mr(calc)	ppm	Miss	Score	Expect	Rank	Query
	K.LAEQAER.Y		1		408.7157	815.4168	815.4137	3.87	0	5	0.63	1	569
	R.NLLSVAYK.N	U	1		454.2687	906.5228	906.5174	5.92	0	16	0.025	1	1202
gi|1341121555	putative effector protein [Heterodera avenae]	35560	16	3(1)	1(1)	0.09	2%
	Peptide	Unique	Matches	Modification	Observed	Mr(expt)	Mr(calc)	ppm	Miss	Score	Expect	Rank	Query
	R.LGPDEAARR.F	U	3		492.7596	983.5047	983.5148	-10.26	1	16	0.026	1	1862
gi|559104802	polyprotein [Bean common mosaic virus]	369529	15	3(1)	2(1)	0.01	0%
	Peptide	Unique	Matches	Modification	Observed	Mr(expt)	Mr(calc)	ppm	Miss	Score	Expect	Rank	Query
	R.VVETTR.L		2		352.6961	703.3777	703.3865	-12.50	0	3	1.4	3	11
	K.KEVGSYDLAIR.K	U	1		417.5636	1249.6691	1249.6666	1.95	1	15	0.03	1	4807
